# 1 **Assessing different components of biodiversity across a river**

## 2 **network using eDNA**

3 Elvira Mächler<sup>1,2\*†</sup>, Chelsea J. Little<sup>1,2†</sup>, Remo Wüthrich<sup>1</sup>, Roman Alther<sup>1,2</sup>, Emanuel A. Fronhofer<sup>1,2,3</sup>,  
4 Isabelle Gounand<sup>1,2</sup>, Eric Harvey<sup>1,2,4</sup>, Samuel Hürlemann<sup>1</sup>, Jean-Claude Walser<sup>5</sup>, Florian Altermatt<sup>1,2\*</sup>

5 <sup>1</sup> Eawag: Swiss Federal Institute of Aquatic Science and Technology, Department of Aquatic Ecology,  
6 Überlandstrasse 133, CH-8600 Dübendorf, Switzerland.

7 <sup>2</sup> Institute of Evolutionary Biology and Environmental Studies, University of Zurich, Winterthurerstrasse  
8 190, CH-8057 Zürich, Switzerland.

9 <sup>3</sup> ISEM, Univ Montpellier, CNRS, EPHE, IRD, Montpellier, France.

10 <sup>4</sup> Département de Sciences Biologiques, Université de Montréal, Montréal, Canada, H2V 2S9

11 <sup>5</sup> Federal Institute of Technology (ETH), Zürich, Genetic Diversity Centre, CHN E 55 Universitätstrasse  
12 16, 8092 Zürich, Switzerland

13

14 † shared first authorship

15 \* corresponding authors: [elvira.maechler@eawag.ch](mailto:elvira.maechler@eawag.ch), [florian.altermatt@eawag.ch](mailto:florian.altermatt@eawag.ch)

16

17 Word count: 6981

18

## 19 **Abstract**

- 20 1. Assessing individual components of biodiversity, such as local or regional taxon richness, and  
21 differences in community composition is a long-standing challenge in ecology. It is especially  
22 relevant in spatially structured and diverse ecosystems. Environmental DNA (eDNA) has been  
23 suggested as a novel technique to accurately measure biodiversity. However, we do not yet  
24 fully understand the comparability of eDNA-based assessments to previously used approaches.
- 25 2. We sampled may-, stone-, and caddisfly genera with contemporary eDNA and kicknet methods  
26 at 61 sites distributed over a large river network, allowing a comparison of various diversity  
27 measures from the catchment to site levels and providing insights into how these measures  
28 relate to network properties. We extended our survey data with historical records of total  
29 diversity at the catchment level.
- 30 3. At the catchment scale, eDNA and kicknet detected similar proportions of the overall and  
31 cumulative historically documented species richness (gamma diversity), namely 42% and 46%,  
32 respectively. We further found a good overlap (62%) between the two contemporary methods at  
33 the regional scale.
- 34 4. At the local scale, we found highly congruent values of local taxon richness (alpha diversity)  
35 between eDNA and kicknet. Richness of eDNA was positively related with discharge, a  
36 descriptor of network position, while kicknet was not.
- 37 5. Beta diversity between sites was similar for the two contemporary methods. Contrary to our  
38 expectation, however, beta diversity was driven by species replacement and not by nestedness.
- 39 6. Although optimization of eDNA approaches is still needed, our results indicate that this novel  
40 technique can capture extensive aspects of gamma diversity, proving its potential utility as a  
41 new tool for large sampling campaigns across hitherto understudied complete river catchments,

42 requiring less time and becoming more cost-efficient than classical approaches. Overall, the  
43 richness estimated with the two contemporary methods is similar at both local and regional  
44 scale but community composition is differently assessed with the two methods at individual  
45 sites and becomes more similar with higher discharge.

46

## 47 **Keywords (eight words or short phrases)**

48 environmental DNA, metabarcoding, freshwater biodiversity, dendritic networks, catchment-scale,  
49 kicknet, biomonitoring

50

## 51 **Introduction**

52 Quantifying biodiversity accurately is a long-standing challenge of primary importance in ecology  
53 (Dornelas et al., 2013, Gotelli and Colwell, 2001, Whittaker, 1972). On the one hand, there is a  
54 fundamental interest to understand the distribution of diversity in time and space and the mechanistic  
55 drivers from local to regional scales (e.g., Gaston, 2000, Gotelli and Colwell, 2011, Koleff et al., 2003).  
56 On the other hand, the state of ecosystems is inherently linked to biodiversity (Pennekamp et al., 2018)  
57 and the current loss of biodiversity has potentially large negative consequences on the functions and  
58 services of ecosystems (Chapin et al., 2000, Isbell et al., 2017). This is especially relevant for freshwater  
59 habitats because they provide crucial ecosystem services such as drinking water, food security, or  
60 recreational value to humanity (Cardinale et al., 2012, Dudgeon et al., 2006, Postel and Carpenter, 1997).

61 In river systems, may-, stone-, and caddisflies (Ephemeroptera, Plecoptera, and Trichoptera;  
62 thereafter abbreviated as EPT) are often used as indicators due to their sensitivity to environmental  
63 change, their different preferences for ecological niches, and their relatively well-known taxonomy  
64 (Schmidt-Kloiber and Hering, 2015). Presence or absence of certain EPT taxa or their overall richness is  
65 highly informative and can be tightly linked to habitat quality. Importantly, they describe not only the

66 current state of a water body but also integrate its changes over time. Thus, EPT are at the heart of many  
67 freshwater quality assessments around the world and are included in many regulatory frameworks, such as  
68 the Water Framework Directive (Directive 2000/60/EC, but see also Borja et al., 2009), or the Canadian  
69 Aquatic Biomonitoring Network (CABIN, Reynoldson et al., 2003).

70 Classically, EPT are collected with a standardized kicknet method (Barbour et al., 1999). Taxa are  
71 then identified under a dissecting microscope, which is time-consuming and therefore costly. Taxon  
72 richness is the most fundamental approach to estimate biodiversity and is still widely used. Even though  
73 the number of taxa is a convincingly intuitive proxy of biodiversity and the basis of many fundamental  
74 concepts in ecology, it is a difficult variable to measure accurately (Gotelli and Colwell, 2011, Purvis and  
75 Hector, 2000). Diversity can be further divided into different components, such as local richness, regional  
76 richness and between-site dissimilarity (also known as alpha, gamma, and beta diversity). The emerging  
77 technique of environmental DNA (eDNA) metabarcoding is expected to become a complementary or even  
78 replacement method (for example see Baird and Hajibabaei, 2012, Deiner et al., 2017, Lawson Handley,  
79 2015). About a decade ago, the first study was published on the detection of species through DNA in an  
80 environmental sample (Ficetola et al., 2008). With the implementation of high throughput sequencing,  
81 which allowed not only detection of single species but whole communities, eDNA metabarcoding has  
82 been proposed to revolutionize biodiversity assessments (Bohmann et al., 2014, Lawson Handley, 2015,  
83 Shokralla et al., 2012). As with every novel technique, eDNA metabarcoding creates new opportunities  
84 but also challenges, especially in terms of recognizing what information it provides and how it compares  
85 to previously implemented and established methodologies.

86 Comparisons between eDNA and traditional methods have hitherto mostly focused on either local  
87 or regional richness comparisons. In river systems, previous studies have generally detected higher taxon  
88 richness with eDNA than kicknet approaches (Civade et al., 2016, Olds et al., 2016, Valentini et al.,  
89 2016). Those results were likely due to eDNA at one location integrating taxon information from upstream  
90 reaches via downstream transportation of eDNA (Deiner and Altermatt, 2014, Deiner et al., 2016, Pont et

91 al., 2018). This suggests that standard techniques represent a more accurate local estimate while eDNA  
92 integrates information across space. In that context, any comparison of the two techniques will be  
93 influenced by the scale of the study. However, we still do not know if findings are directly comparable,  
94 complementary, or different across different spatial scales and across different components of  
95 biodiversity, due to the specific properties of kicknet and eDNA sampling. A detailed understanding is  
96 needed to make decisions on how to sample biodiversity in complex landscapes and to compare both local  
97 and regional measures. This is particularly relevant in river landscapes, where the typical underlying  
98 dendritic network structure is known to affect biodiversity (Altermatt, 2013, Altermatt et al., 2013, Carrara  
99 et al., 2012, Harvey et al., 2018, Tonkin et al., 2018).

100 In our study, we compared different measures of biodiversity of EPT sampled classically (i.e., by  
101 kicknet) or by eDNA, using a spatially structured approach that representatively covered a river network  
102 in a 740 km<sup>2</sup> catchment. We analyzed how these two different approaches capture the facets of  
103 biodiversity at the level of alpha (local site), beta (between sites), and gamma diversity (catchment level).  
104 Gamma diversity information was supplemented with all historically available data. Given that taxon  
105 richness is among the most-commonly studied biodiversity variables, we discuss the design of biodiversity  
106 monitoring with eDNA in dendritic river networks.

107

## 108 **Material & Methods**

109 We studied a river network in a 740 km<sup>2</sup> catchment containing 61 sampling sites in the upper river  
110 Thur in north-eastern Switzerland (Fig.1, Table S1). The catchment comprises three main river-stems:  
111 Thur, Glatt, and Necker, the latter two draining into the Thur. In a sampling campaign conducted from  
112 June 11 to June 22 2016, we collected eDNA and benthic invertebrate kicknet samples, with the two  
113 sampling methods performed at each site within a two-day window. To characterize the position of sites in  
114 the network, we extracted stream order, catchment area and the mean annual discharge data for each site  
115 from existing databases (BAFU, 2013, BAFU, 2014, Faundler et al., 2013).

116 *Historical data*

117 We obtained long-term biodiversity data on gamma diversity in our catchment from the Centre  
118 Suisse de la Cartographie de la Faune (CSCF). These data include all EPT species ever recorded in the  
119 whole catchment over the time-period 1981–2016. The data are of various sampling origins, but of high  
120 quality, thus giving a highly robust and reliable cumulative estimate of EPT genus richness (and the  
121 respective EPT genus identity) at the whole catchment scale. The cumulative data consist of 3,467  
122 individual records based on observations of the species in an area of the catchment, which we then  
123 converted into genus richness.

124 *Contemporary kicknet data*

125 We collected benthic macroinvertebrates based on three-minute kicknet sampling applied to three  
126 microhabitats present at a given site (Barbour et al., 1999). Leaves and debris were removed from the  
127 sample and the remaining material was pooled and stored in 96% molecular grade ethanol. In the lab, all  
128 EPT individuals were identified with a microscope to species level. A few taxa, only present as early  
129 instar larva or containing cryptic species, were grouped in pre-defined complexes, subsequently treated at  
130 the genus. We could not assess EPT taxa at one site due to the loss of a sample.

131 *eDNA filtration in the field*

132 At each site, we sampled three times 250 mL of river water, each on a separate filter (for detailed  
133 description see Mächler et al., 2018). We collected eDNA samples about 5–10 meters upstream of the  
134 kicknet sampling to minimize cross-contamination. Samples were stored in a Styrofoam box equipped  
135 with cooling elements until we came back from the field (no longer than 9 h). Thereafter, they were stored  
136 at -20 °C until further processing. On each field day, we performed a replicated filter control (FC) that was  
137 filtered in the field before any sampling site was visited in order to check if the reusable material was  
138 clean. In total, we generated 11 filter controls, each consisting of three replicates. Operational taxonomic  
139 units found in at least two replicates of a filter control from the same date were removed from all samples

140 for the further analysis. Further information on filtration, eDNA facilities, and material preparation can be  
141 found in the supplementary file.

#### 142 *Extraction and library preparation*

143 Detailed information about the extraction and library preparation can be found in the  
144 supplementary file. In short, we used the DNeasy Blood and Tissue kit (Qiagen GmbH, Hilden, Germany)  
145 to extract the DNA from eDNA samples, also including extraction controls (EC). We used an Illumina  
146 MiSeq dual-barcoded two-step PCR amplicon sequencing protocol. The first PCR was performed with  
147 modified primers that contained an adaptor-specific tail, a heterogeneity spacer, and the amplicon target  
148 site (see Table S2). On each of the PCR plates, we implemented one negative (NC) and one positive PCR  
149 control (PC). The negative control consisted of 5  $\mu$ L sigma water and the positive control consisted of 4  
150  $\mu$ L sample and 1  $\mu$ L (0.01 ng/ $\mu$ L) artificial dummy DNA (a randomly generated double-stranded DNA  
151 sequence that was 313 bp in length and matched primer region, see supplementary information). We then  
152 pooled the three PCR replicates per sample and cleaned it with SPRI beads. For the second PCR, we used  
153 the Nextera XT Index kit v2 (Illumina California, USA) to index each sample and cleaned afterwards the  
154 index reaction with SPRI beads. We quantified each sample with the Spark 10M Multimode Microplate  
155 Reader (Tecan Group Ltd., Männedorf, Switzerland) and pooled them in equimolar parts into a final pool  
156 that we cleaned with SPRI beads. All controls (FC, EC, PC, NC) were run alongside the samples and were  
157 pooled according to their concentrations. Controls that were too low to quantify were pooled into the  
158 second lowest concentrated pool with 10  $\mu$ L, equal to the volume of the lowest sample in the respective  
159 pool. The libraries were added at 16 pM concentration and PhiX control was added at a 10%  
160 concentration. A paired-end (2x300 nt) sequencing was performed on an Illumina MiSeq (MiSeq Reagent  
161 kit v3, 300 cycles) following the manufacture's run protocols (Illumina, California, USA). To increase the  
162 sequencing depth, a second run of the same pooled libraries was conducted.

163

#### 164 *Bioinformatic data processing*

165           After the two successful Illumina MiSeq runs, the data was demultiplexed and the quality of the  
166 reads was checked with FastQC (Andrews, 2010). Raw reads were end-trimmed (usearch v10.0.240,  
167 R1:30nt, R2:50nt) and merged with an overlap of min 15 bp max 300 bp (Flash, v1.2.11). Next, the primer  
168 sites were removed (full length, no mismatch allowed (cutadapt v1.12)) and thereafter, the data was  
169 quality filtered (prinseq-lite v0.20.4) using the following parameters: size range (100–500), GC range (30–  
170 70), mean quality (20), and low complexity filter dust (30). In a next step, UNOISE3 (usearch v10.0.240)  
171 was used to determine amplicon sequence variants (zero-radius OTUs, thereafter called ZOTUs).  
172 UNOISE3 has a build-in error-correction to reduce the influence of sequencing errors (Edgar, 2016). An  
173 additional clustering at 99% sequence identity was performed to reduce sequence diversity and to account  
174 for possible amplification errors in the first PCR. The resulting ZOTUs (zero-radius OTUs, thereafter  
175 called ZOTUs) were checked for stop codons using the invertebrate mitochondrial code, to ensure an  
176 intact open reading frame. This resulted in 27 M reads corresponding to 11,313 ZOTUS (Table S3). As a  
177 final step, the ZOTUs were assigned to taxa (blast 2.3.0 and usearch v10.0.240, tax filter = 0.9).

## 178 *Statistics*

179           Our analysis was based on the following strategy: First, we confirmed that the two Illumina runs  
180 could be combined and second we cleaned the sequencing data and selected only ZOTUs that were  
181 assigned to an EPT order (see detailed information in the supplementary file). For individual sites,  
182 ZOTUS were only counted if they were present in at least two of the three independent replicates (Fig.  
183 S1), which is a highly stringent assumption and conservative with respect to detection of taxa. Thereafter,  
184 we were able to analyze various diversity measures to identify similarities and differences between eDNA  
185 and kicknet sampling approaches: (i) gamma, (ii) alpha, (iii) beta diversity, and (iv) between method  
186 community dissimilarity. All statistical analyses were performed using R (R Core Team, version 3.4.4).

## 187 *Gamma diversity*



188           We used the R package ‘venneuler’ (Wilkinson and Urbanek, 2011) to draw Venn diagrams for  
189 gamma richness of historic, eDNA and kicknet data. We used the R package ‘vegan’ (Oksanen et al.,  
190 2011) to calculate taxa accumulation curves of the two methods over the whole catchment.

191 Alpha diversity

192           To compare diversity estimates delivered by the two methods, we used the R packages ‘phyloseq’  
193 (McMurdie and Holmes, 2013, version 1.22.3) to calculate richness. With a Pearson’s correlation test we  
194 identified if richness measures at sampling sites correlate between the two contemporary methods. We  
195 then tested if genus richness of the two methods increased with discharge, using a linear model.

196 Beta diversity

197           We used Sørensen dissimilarity as a measure of beta-diversity, based on presence/absence data.  
198 With the R package ‘betapart’ (Baselga et al., 2017) we calculated Sørensen dissimilarity, which can be  
199 further partitioned into nestedness and turnover components, allowing us to distinguish dissimilarity  
200 arising through embedment (i.e. loss) or replacement of species (Baselga, 2010, Baselga et al., 2017). To  
201 observe how beta diversity measures relate to stream distance, we extracted distances between sites and  
202 nodes from GIS data (swisstopo) and added these as edge weights. We then constructed the adjacency  
203 matrix representing our fluvial network consisting of edges and vertices with the R package ‘igraph’  
204 (Csardi and Nepusz, 2006, version 1.2.1) to calculate stream distance between flow-connected sampling  
205 points. We used linear models to test if distance and the difference in stream order of the compared sites  
206 explain patterns in the beta diversity measures. We compared models including a null model, models  
207 containing only one of the explanatory variables, or both variables (with and without interaction), and  
208 performed model averaging in order to calculate relative variable importance (R package ‘MuMIn’,  
209 Barton, 2009, version 1.40.4). We additionally calculated Sørensen dissimilarity and checked for  
210 differences among stream orders. First, we tested for heterogeneous variance with a Bartlett test, and if it  
211 was significant, we performed a Kruskal-Wallis test to identify whether there was at least one difference

212 in means. If this was true, then we followed a multiple mean comparison post-hoc test on rank sums (R  
213 package 'pgirmess', Giraudoux, 2018, version 1.6.9).

214 Between-method community dissimilarity

215 We also calculated Sørensen dissimilarity and its two components, nestedness and turnover,  
216 between eDNA and kicknet samples for each individual site to detect discrepancies in community  
217 composition between the two contemporary methods.

218

## 219 **Results**

220 *Gamma diversity*

221 At the regional scale (i.e., the whole catchment level), 96 different EPT genera were historically  
222 documented. We found 47 EPT genera with our kicknet samples and 42 genera with our eDNA samples,  
223 reflecting 46% and 42% of the historically established taxa richness, respectively (Fig. 2, Table S4). A  
224 high proportion of these sampled taxa were already present in the historic records (94% and 95%  
225 respectively). Thirty-six of these EPT genera were detected with both the kicknet and the eDNA method,  
226 reflecting a 62% overlap of the two methods. Both methods also detected a similar additional proportion  
227 of taxa found by one method only, but present in the historic dataset (Fig. 2). Finally, we found four  
228 genera with eDNA, kicknet sampling, or both approaches that were not previously listed in the historic  
229 data. All of these four genera occur at the border of our studied catchment and rare, single appearances  
230 within the catchment are possible. Separate taxon accumulation curves (accumulating gamma richness  
231 with number of sites included) for the kicknet and the eDNA methods were qualitatively similar (Fig.  
232 S2A), based on visual comparison of the curves and their 95% confidence band. This pattern remained  
233 similar even if sites were accumulated in the order from the most downstream to the most upstream sites  
234 (Fig. S2B).

235 *Alpha diversity*

236 At the local scale, the two contemporary methods revealed similar genus richness (eDNA  $M =$   
237  $10.22$ ,  $SD = 4.2$ ; kicknet  $M = 10.47$ ,  $SD = 3.1$ ), and the detected richness values were positively correlated  
238 ( $r(58) = 0.42$ ,  $P < 0.001$ ; Fig. 3). As eDNA is transported through the river network, we expected a  
239 positive dependency of the detected richness of eDNA on increasing discharge (i.e., in more downstream  
240 sites), which we do not expect for kicknet samples. Indeed, we found a positive relationship between  
241 genus richness and discharge for eDNA ( $\beta = 0.537$ ,  $t(58) = 2.848$ ,  $p = 0.006$ ) but not for kicknet ( $\beta =$   
242  $0.073$ ,  $t(58) = 0.495$ ,  $p = 0.62$ ), however, the adjusted  $R^2$  was relatively low (eDNA  $R^2 = 0.101$ , Fig. 4).

243

244 *Beta diversity*

245 Overall, we found comparable Sørensen dissimilarity between flow-connected sites for eDNA  
246 and kicknet. For both methods, the turnover component contributed more to the dissimilarity than  
247 nestedness-related components (Fig. 5, see Table S5 for information on detected genera per site), which  
248 was more pronounced for eDNA than kicknet. The analysis for the relative importance of variables  
249 showed that differences in stream order were generally more important for all beta diversity measures,  
250 however, for turnover of both eDNA and kicknet, pairwise distance between sites showed only partially  
251 lower importance compared to the differences in stream order (Table S6). Both methods showed  
252 significant differences in mean Sørensen dissimilarity among stream orders, and we found significant  
253 group differences for the post-hoc mean comparisons in stream orders (Fig. S3, Table S7).

254

255 *Between-method community dissimilarity*

256 We found an intermediate discrepancy in the community compositions described by the two  
257 contemporary methods ( $M = 0.48$ ,  $SD = 0.14$ , Fig. S4), and partitioning this difference into nestedness and  
258 turnover components indicates that turnover contributes more to the differences of detected EPT genera.

259

260 **Discussion**

261           We compared different measures of biodiversity of EPT sampled by kicknet versus by eDNA, using  
262 a spatially structured approach and covering a major river network. Using a unique historically assembled  
263 overview of cumulative, “true” gamma diversity within the study region, we were able to put our  
264 contemporary samples in a historic context. We found a quantitatively similar overlap between each  
265 contemporary approach and historic gamma diversity, in accordance with other studies comparing eDNA  
266 with long-term data in freshwater systems (e.g., Hänfling et al., 2016, Valentini et al., 2016). Given that  
267 the historic data set covers several decades (1981–2016), we do not expect that all taxa are still present in  
268 the catchment at the time of this study (2016) due to changes in distribution or local extinctions, and we  
269 would also expect some new taxa to appear. Thus, the observed 42% overlap between a single snapshot  
270 sampling campaign and the gamma diversity obtained by cumulative sampling efforts over almost four  
271 decades is relatively high. Surprisingly, taxon accumulation curves for eDNA and kicknet sampling were  
272 not significantly different, although we expected that downstream transport of DNA would contribute to a  
273 faster increase and saturation of genera for eDNA compared to kicknet sampling. Our approach suggests  
274 that a single eDNA sampling campaign may cover large parts of historically detected gamma diversity.  
275 This indicates that eDNA could be used as a new tool for rapid network-level richness analyses and  
276 biodiversity assessments. Such systematic BioBlitz sampling campaigns (Lundmark, 2003, Laforest et al.,  
277 2013) across hitherto understudied complete river catchments may be a promising avenue, since  
278 minimally trained people without any taxonomic expertise can collect great parts of regional or even  
279 landscape richness in a rapid time frame with this method.

280           We also found a reasonable congruency in local alpha diversity of the two contemporary methods  
281 and identified a new dependency of eDNA estimates on discharge level. Overall, local richness estimates  
282 of eDNA and kicknet sampling are highly comparable. This comparability may be strengthened by our  
283 highly stringent inclusion criteria for eDNA estimates which are more conservative than those used in  
284 previous studies that detected higher richness with eDNA compared to traditional methods (e.g., Deiner et  
285 al., 2016, Valentini et al., 2016). In addition, we used a barcoding primer targeting a broad taxonomic  
286 range, which may also have a lower detection rate for specific taxonomic groups. In near future, the

287 forthcoming design and use of EPT specific primers or the completion of EPT sequence references should  
288 reduce the current drawbacks of eDNA methods regarding taxonomic identification. For eDNA we found  
289 a positive relationship between richness and discharge, which was not the case for kicknet data and could  
290 be attributed to eDNA integrating biodiversity detection across space due to downstream transport (Deiner  
291 et al., 2016, Li et al., 2018, Pont et al., 2018). Alternatively, richness indeed increased with discharge (i.e.  
292 downstream), but the slightly sub-optimal sampling period (summer) and the simplified kicknet protocol  
293 we used was an inappropriate technique for sampling larger streams and thus obscured the relationship.  
294 Both aspects reduce detection of genera with the traditional methods, as some species might be missed due  
295 to reduced sampling effort or immature larval stages hampering identification. Surprisingly, the 7<sup>th</sup> stream  
296 order sites diverge from this pattern, potentially because we could only access part of these wide river  
297 cross-sections, and sampling was restricted to the river edge where less mixing occurs, where more  
298 extensive sampling may be needed with eDNA (Bylemans et al., 2018). Also, recent studies indicate that  
299 eDNA is not evenly distributed in the water column (Macher and Leese, 2017), and it is still unclear how  
300 spatial variance in structures, such as riffles and ponds, are affecting the mixing of the water column and  
301 thus the equal detection of eDNA along the water column. We speculate that only in smaller streams (1<sup>st</sup>  
302 to 5<sup>th</sup> order) one or two samples from the edge or in the center adequately reflect the eDNA distribution  
303 across the river transect, while in larger rivers multiple samples across the cross-section may be  
304 recommended.

305 We found that pairwise beta diversity (Sørensen dissimilarity) at the local scale was similarly  
306 assessed by the two methods, which is congruent to findings by Li et al. (2018). Despite differences  
307 among sites in Sørensen dissimilarity, the turnover component (i.e., species replacement) contributes more  
308 to the dissimilarity than nestedness for both methods but is even more pronounced for eDNA than kicknet.  
309 Turnover indicates that species are replaced between the sites and implies that transportation of eDNA is  
310 not the main mechanisms driving differences, otherwise nestedness would be expected to be stronger.  
311 Barnes & Turner (2016) presented many processes (e.g., degradation, re-suspension, or fragmentation)

312 that influence eDNA in the environment and therefore challenge our mechanistic understanding. Thus, it  
313 remains unclear whether the detected differences stem from ecological or methodological variation.

314 Studies on diversity patterns have long focused on a linear view of streams. But it is now  
315 increasingly acknowledged that the underlying network structure plays a significant role in shaping  
316 species distributions (Carrara et al., 2012, Harvey and Altermatt, 2019, Harvey et al., 2018, Holyoak et al.,  
317 2005, Seymour et al., 2015, Tonkin et al., 2018). While experimental lab studies and field surveys have  
318 found general patterns of diversity distribution in river landscapes, we do not know if eDNA will lead to  
319 similar findings or not. Multiple studies showed that there is higher beta diversity among headwaters  
320 compared to downstream reaches (Altermatt et al., 2013, Carrara et al., 2012, Finn et al., 2011). When  
321 comparing beta diversity within stream orders we detect differences between groups of stream orders for  
322 both methods. These differences are mainly between beta diversity of large stream orders and small  
323 stream orders, as expected by theory.

324 Overall, for local composition, we see some discrepancy of the two methods for community  
325 composition at specific sites. This discrepancy is driven by turnover, indicating that detection of different  
326 species with the two methods differs, and is not due to the integration of eDNA over distance. We see  
327 several mechanisms which could cause this difference between the two methods. First, bias introduced in  
328 the lab process may have hampered the detection of species that were actually present (e.g., through  
329 primer bias (Elbrecht and Leese, 2017), PCR stochasticity (Leray and Knowlton, 2017), sequencing depth,  
330 etc.). The design of specific EPT primers may improve comparison and deliver even a better overlap than  
331 a universal eukaryotic primer as we used in this study. Second, DNA shedding rates, densities, and  
332 activity can differ between genera (Bylemans et al., 2017, de Souza et al., 2016, Sassoubre et al., 2016)  
333 and affect the eDNA detection. Also, it remains unknown how habitat preferences of different genera  
334 affect detection due to limited mixing or flow of the preferred habitat. Third, it is possible that DNA got  
335 re-suspended from sediments through the mixing of the water column or other disturbances (Jerde et al.,  
336 2016, Shogren et al., 2017, Shogren et al., 2016), resulting in a signal of locally extinct taxa. However, we

337 have no indication from the historic data that genera detected only with eDNA have been absent in the  
338 catchment for a longer time.

339

## 340 **Conclusion**

341 The distribution of biodiversity and indicator species is of interest to many fields in ecology, from  
342 basic research and theory to applied projects of biodiversity conservation and ecosystem assessments. Our  
343 work identifies novel opportunities of eDNA as a reliable tool to detect biodiversity patterns, similar to  
344 traditional kicknet sampling in riverine networks. Our findings show high robustness of the method,  
345 allowing its use for rapid richness analyses and offering the potential to do quick assessments of  
346 biodiversity with untrained collectors for BioBlitz campaigns or citizen science projects. However, if the  
347 goal is to extend previous biomonitoring or biodiversity datasets with eDNA sampling, the spatial scale  
348 must be considered when designing sampling schemes to detect taxon richness.

349

## 350 **Authors' contributions**

351 EM, CJL, RA, EF, IG, EH, JCW and FA conceived the ideas and designed methodology; EM, CJL, RW,  
352 RA, EF, IG, EH, SH, JCW, and FA collected the data; EM, JCL, RW, and JCW analysed the data; EM  
353 and FA led the writing of the manuscript. All authors contributed critically to the drafts and gave final  
354 approval for publication.

355

## 356 **Acknowledgements**

357 Data analyzed in this paper were generated in collaboration with the Genetic Diversity Centre (GDC),  
358 ETH Zurich. We would like to thank Simon Flückiger and Sereina Gut for help in the lab and Rosi Sieber  
359 for support with the GIS data. Special thanks go to Rosetta Blackman, Kristy Deiner, and Hanna  
360 Hartikainen for inputs on the manuscript. We thank the Centre Suisse de Cartographie de la Faune  
361 (CSCF)/InfoFauna for the historic data on EPT in the Thur catchment. Funding is from the Swiss National  
362 Science Foundation Grants No PP00P3\_179089 and 31003A\_173074, the Velux Foundation, and the  
363 University of Zurich Research Priority Program “*URPP Global Change and Biodiversity*” (to F.A.), and  
364 the Forschungskredit grant of the University of Zürich (to IG). This is publication ISEM-YYYY-XXX of  
365 the Institut des Sciences de l'Evolution - Montpellier.

366

## 367 **Data accessibility**

368 Sequencing data will be publicly available on Dryad after publication.

369

## 370 **Supporting information**

371 See supplementary file attached to the paper.

372



## 373 REFERENCES

- 374 ALTERMATT, F. 2013. Diversity in riverine metacommunities: a network perspective. *Aquatic Ecology*,  
375 47, 365-377.
- 376 ALTERMATT, F., SEYMOUR, M. & MARTINEZ, N. 2013. River network properties shape  $\alpha$ -diversity  
377 and community similarity patterns of aquatic insect communities across major drainage basins.  
378 *Journal of Biogeography*, 40, 2249-2260.
- 379 ANDREWS, S. 2010. FastQC: a quality control tool for high throughput sequence data.
- 380 BAFU 2013. Flussordnungszahl (FLOZ). CH-3003 Bern: Bundesamt für Umwelt (BAFU).
- 381 BAFU 2014. Gewässerabschnittsbasierte Einzugsgebietsgliederung der Schweiz GAB-EZGG-CH. In:  
382 (BAFU), B. F. U. (ed.). CH-3003 Bern.
- 383 BAIRD, D. J. & HAJIBABAEI, M. 2012. Biomonitoring 2.0: a new paradigm in ecosystem assessment  
384 made possible by next-generation DNA sequencing. *Molecular Ecology*, 21, 2039-2044.
- 385 BARBOUR, M. T., GERRITSEN, J., SNYDER, B. & STRIBLING, J. 1999. Rapid bioassessment  
386 protocols for use in streams and wadeable rivers. *USEPA, Washington*.
- 387 BARNES, M. A. & TURNER, C. R. 2016. The ecology of environmental DNA and implications for  
388 conservation genetics. *Conservation Genetics*, 17, 1-17.
- 389 BARTON, K. 2009. MuMIn: multi-model inference, R package version 0.12.0. <http://r-forge.r-project.org/projects/mumin/>.
- 391 BASELGA, A. 2010. Partitioning the turnover and nestedness components of beta diversity. *Global*  
392 *Ecology and Biogeography*, 19, 134-143.
- 393 BASELGA, A., ORME, D., VILLEGER, S., DE BORTOLI, J. & LEPRIEUR, F. 2017. Partitioning beta  
394 diversity into turnover and nestedness components. *Package betapart, Version*, 1.4-1.
- 395 BOHMANN, K., EVANS, A., GILBERT, M. T. P., CARVALHO, G. R., CREER, S., KNAPP, M.,  
396 DOUGLAS, W. Y. & DE BRUYN, M. 2014. Environmental DNA for wildlife biology and  
397 biodiversity monitoring. *Trends in ecology & evolution*, 29, 358-367.

- 398 BORJA, A., MILES, A., OCCHIPINTI-AMBROGI, A. & BERG, T. 2009. Current status of  
399 macroinvertebrate methods used for assessing the quality of European marine waters:  
400 implementing the Water Framework Directive. *Hydrobiologia*, 633, 181-196.
- 401 BYLEMANS, J., FURLAN, E. M., HARDY, C. M., MCGUFFIE, P., LINTERMANS, M. & GLEESON,  
402 D. M. 2017. An environmental DNA-based method for monitoring spawning activity: a case  
403 study, using the endangered Macquarie perch (*Macquaria australasica*). *Methods in Ecology and*  
404 *Evolution*, 8, 646-655.
- 405 BYLEMANS, J., GLEESON, D. M., LINTERMANS, M., HARDY, C. M., BEITZEL, M., GILLIGAN,  
406 D. M. & FURLAN, E. M. 2018. Monitoring riverine fish communities through eDNA  
407 metabarcoding: determining optimal sampling strategies along an altitudinal and biodiversity  
408 gradient. *Metabarcoding and Metagenomics*, 2.
- 409 CARDINALE, B. J., DUFFY, J. E., GONZALEZ, A., HOOPER, D. U., PERRINGS, C., VENAIL, P.,  
410 NARWANI, A., MACE, G. M., TILMAN, D. & WARDLE, D. A. 2012. Biodiversity loss and its  
411 impact on humanity. *Nature*, 486, 59.
- 412 CARRARA, F., ALTERMATT, F., RODRIGUEZ-ITURBE, I. & RINALDO, A. 2012. Dendritic  
413 connectivity controls biodiversity patterns in experimental metacommunities. *Proceedings of the*  
414 *National Academy of Sciences*, 109, 5761-5766.
- 415 CHAPIN, F. S., III, ZAVALETA, E. S., EVINER, V. T., NAYLOR, R. L., VITOUSEK, P. M.,  
416 REYNOLDS, H. L., HOOPER, D. U., LAVOREL, S., SALA, O. E. & HOBBIE, S. E. 2000.  
417 Consequences of changing biodiversity. *Nature*, 405, 234.
- 418 CIVADE, R., DEJEAN, T., VALENTINI, A., ROSET, N., RAYMOND, J. C., BONIN, A., TABERLET,  
419 P. & PONT, D. 2016. Spatial Representativeness of Environmental DNA Metabarcoding Signal  
420 for Fish Biodiversity Assessment in a Natural Freshwater System. *PLoS One*, 11, e0157366.
- 421 CSARDI, G. & NEPUSZ, T. 2006. The igraph software package for complex network research.  
422 *InterJournal, Complex Systems*, 1695, 1-9.

- 423 DE SOUZA, L. S., GODWIN, J. C., RENSCHAW, M. A. & LARSON, E. 2016. Environmental DNA  
424 (eDNA) Detection Probability Is Influenced by Seasonal Activity of Organisms. *PLoS One*, 11,  
425 e0165273.
- 426 DEINER, K. & ALTERMATT, F. 2014. Transport distance of invertebrate environmental DNA in a  
427 natural river. *PLoS One*, 9, e88786.
- 428 DEINER, K., BIK, H. M., MÄCHLER, E., SEYMOUR, M., LACOURSIERE-ROUSSEL, A.,  
429 ALTERMATT, F., CREER, S., BISTA, I., LODGE, D. M., DE VERE, N., PFRENDER, M. E. &  
430 BERNATCHEZ, L. 2017. Environmental DNA metabarcoding: Transforming how we survey  
431 animal and plant communities. *Mol Ecol*, 26, 5872-5895.
- 432 DEINER, K., FRONHOFER, E. A., MÄCHLER, E., WALSER, J. C. & ALTERMATT, F. 2016.  
433 Environmental DNA reveals that rivers are conveyor belts of biodiversity information. *Nat*  
434 *Commun*, 7, 12544.
- 435 DORNELAS, M., MAGURRAN, A. E., BUCKLAND, S. T., CHAO, A., CHAZDON, R. L., COLWELL,  
436 R. K., CURTIS, T., GASTON, K. J., GOTELLI, N. J. & KOSNIK, M. A. 2013. Quantifying  
437 temporal change in biodiversity: challenges and opportunities. *Proceedings of the Royal Society*  
438 *B: Biological Sciences*, 280, 20121931.
- 439 DUDGEON, D., ARTHINGTON, A. H., GESSNER, M. O., KAWABATA, Z.-I., KNOWLER, D. J.,  
440 LÉVÊQUE, C., NAIMAN, R. J., PRIEUR-RICHARD, A.-H., SOTO, D., STIASSNY, M. L. J. &  
441 SULLIVAN, C. A. 2006. Freshwater biodiversity: importance, threats, status and conservation  
442 challenges. *Biological Reviews*, 81, 163-182.
- 443 EDGAR, R. C. 2016. UNOISE2: improved error-correction for Illumina 16S and ITS amplicon  
444 sequencing. *bioRxiv*, 081257.
- 445 ELBRECHT, V. & LEESE, F. 2017. Validation and Development of COI Metabarcoding Primers for  
446 Freshwater Macroinvertebrate Bioassessment. *Frontiers in Environmental Science*, 5.
- 447 FAUNDLER, M., SCHÖNBERGER, U. & BAFU 2013. Datensatz MQ-GWN\_CH, modellierte mittlere  
448 natürliche Abflüsse für das Gewässernetz der Schweiz.

- 449 FICETOLA, G. F., MIAUD, C., POMPANON, F. & TABERLET, P. 2008. Species detection using  
450 environmental DNA from water samples. *Biology Letters*, 4, 423-425.
- 451 FINN, D. S., BONADA, N., MÚRRIA, C. & HUGHES, J. M. 2011. Small but mighty: headwaters are  
452 vital to stream network biodiversity at two levels of organization. *Journal of the North American*  
453 *Benthological Society*, 30, 963-980.
- 454 GASTON, K. J. 2000. Global patterns in biodiversity. *Nature*, 405, 220.
- 455 GIRAUDOUX, P. 2018. pgrimess: Spatial Analysis and Data Mining for Field Ecologists. *R package*  
456 *version*, 361, 9.
- 457 GOTELLI, N. J. & COLWELL, R. K. 2001. Quantifying biodiversity: procedures and pitfalls in the  
458 measurement and comparison of species richness. *Ecology letters*, 4, 379-391.
- 459 GOTELLI, N. J. & COLWELL, R. K. 2011. Estimating species richness. *Biological diversity: frontiers in*  
460 *measurement and assessment*, 12, 39-54.
- 461 HÄNFLING, B., LAWSON HANDLEY, L., READ, D. S., HAHN, C., LI, J., NICHOLS, P.,  
462 BLACKMAN, R. C., OLIVER, A. & WINFIELD, I. J. 2016. Environmental DNA metabarcoding  
463 of lake fish communities reflects long-term data from established survey methods. *Molecular*  
464 *Ecology*.
- 465 HARVEY, E. & ALTERMATT, F. 2019. Regulation of the functional structure of aquatic communities  
466 across spatial scales in a major river network. *Ecology*, e02633.
- 467 HARVEY, E., GOUNAND, I., FRONHOFER, E. A. & ALTERMATT, F. 2018. Disturbance reverses  
468 classic biodiversity predictions in river-like landscapes. *Proceedings of the Royal Society B*, 285,  
469 20182441.
- 470 HOLYOAK, M., LEIBOLD, M. A. & HOLT, R. D. 2005. *Metacommunities: spatial dynamics and*  
471 *ecological communities*, University of Chicago Press.
- 472 ISBELL, F., GONZALEZ, A., LOREAU, M., COWLES, J., DÍAZ, S., HECTOR, A., MACE, G. M.,  
473 WARDLE, D. A., O'CONNOR, M. I., DUFFY, J. E., TURNBULL, L. A., THOMPSON, P. L. &

- 474 LARIGAUDERIE, A. 2017. Linking the influence and dependence of people on biodiversity  
475 across scales. *Nature*, 546, 65.
- 476 JERDE, C. L., OLDS, B. P., SHOGREN, A. J., ANDRUSZKIEWICZ, E. A., MAHON, A. R.,  
477 BOLSTER, D. & TANK, J. L. 2016. Influence of stream bottom substrate on retention and  
478 transport of vertebrate environmental DNA. *Environmental science & technology*, 50, 8770-8779.
- 479 KOLEFF, P., GASTON, K. J. & LENNON, J. J. 2003. Measuring beta diversity for presence-absence  
480 data. *Journal of Animal Ecology*, 72, 367-382.
- 481 LAWSON HANDLEY, L. 2015. How will the ‘molecular revolution’ contribute to biological recording?  
482 *Biological Journal of the Linnean Society*, 115, 750-766.
- 483 LERAY, M. & KNOWLTON, N. 2017. Random sampling causes the low reproducibility of rare  
484 eukaryotic OTUs in Illumina COI metabarcoding. *PeerJ*, 5, e3006.
- 485 LI, Y., EVANS, N. T., RENSHAW, M. A., JERDE, C. L., OLDS, B. P., SHOGREN, A. J., DEINER, K.,  
486 LODGE, D. M., LAMBERTI, G. A. & PFRENDER, M. E. 2018. Estimating fish alpha-and beta-  
487 diversity along a small stream with environmental DNA metabarcoding. *Metabarcoding and*  
488 *Metagenomics*, 2, e24262.
- 489 MACHER, J.-N. & LEESE, F. 2017. Environmental DNA metabarcoding of rivers: Not all eDNA is  
490 everywhere, and not all the time. *bioRxiv*.
- 491 MÄCHLER, E., OSATHANUNKUL, M. & ALTERMATT, F. 2018. Shedding light on eDNA: neither  
492 natural levels of UV radiation nor the presence of a filter feeder affect eDNA-based detection of  
493 aquatic organisms. *PloS one*, 13, e0195529.
- 494 MCMURDIE, P. J. & HOLMES, S. 2013. phyloseq: an R package for reproducible interactive analysis  
495 and graphics of microbiome census data. *PloS one*, 8, e61217.
- 496 OKSANEN, J., BLANCHET, F. G., KINDT, R., LEGENDRE, P., MINCHIN, P. R., O’HARA, R.,  
497 SIMPSON, G. L., SOLYMOS, P., STEVENS, M. H. H. & WAGNER, H. 2011. vegan:  
498 Community ecology package. *R package version*, 117-118.

- 499 OLDS, B. P., JERDE, C. L., RENSHAW, M. A., LI, Y., EVANS, N. T., TURNER, C. R., DEINER, K.,  
500 MAHON, A. R., BRUESEKE, M. A., SHIREY, P. D., PFRENDER, M. E., LODGE, D. M. &  
501 LAMBERTI, G. A. 2016. Estimating species richness using environmental DNA. *Ecol Evol*, 6,  
502 4214-26.
- 503 PENNEKAMP, F., PONTARP, M., TABI, A., ALTERMATT, F., ALTHER, R., CHOFFAT, Y.,  
504 FRONHOFER, E. A., GANESANANDAMOORTHY, P., GARNIER, A. & GRIFFITHS, J. I.  
505 2018. Biodiversity increases and decreases ecosystem stability. *Nature*, 563, 109.
- 506 PONT, D., ROCLE, M., VALENTINI, A., CIVADE, R., JEAN, P., MAIRE, A., ROSET, N.,  
507 SCHABUSS, M., ZORNIG, H. & DEJEAN, T. 2018. Environmental DNA reveals quantitative  
508 patterns of fish biodiversity in large rivers despite its downstream transportation. *Scientific*  
509 *reports*, 8, 10361.
- 510 POSTEL, S. & CARPENTER, S. 1997. Freshwater ecosystem services. *Nature's services: Societal*  
511 *dependence on natural ecosystems*, 195.
- 512 PURVIS, A. & HECTOR, A. 2000. Getting the measure of biodiversity. *Nature*, 405, 212.
- 513 REYNOLDSON, T., LOGAN, C., PASCOE, T. & THOMPSON, S. 2003. CABIN (Canadian Aquatic  
514 Biomonitoring Network) invertebrate biomonitoring field and laboratory manual. *Environment*  
515 *Canada, National Water Research Institute*.
- 516 SASSOUBRE, L. M., YAMAHARA, K. M., GARDNER, L. D., BLOCK, B. A. & BOEHM, A. B. 2016.  
517 Quantification of Environmental DNA (eDNA) Shedding and Decay Rates for Three Marine Fish.  
518 *Environ Sci Technol*, 50, 10456-10464.
- 519 SCHMIDT-KLOIBER, A. & HERING, D. 2015. www. freshwaterecology. info—An online tool that  
520 unifies, standardises and codifies more than 20,000 European freshwater organisms and their  
521 ecological preferences. *Ecological Indicators*, 53, 271-282.
- 522 SEYMOUR, M., FRONHOFER, E. A. & ALTERMATT, F. 2015. Dendritic network structure and  
523 dispersal affect temporal dynamics of diversity and species persistence. *Oikos*, 124, 908-916.

- 524 SHOGREN, A. J., TANK, J. L., ANDRUSZKIEWICZ, E., OLDS, B., MAHON, A. R., JERDE, C. L. &  
525 BOLSTER, D. 2017. Controls on eDNA movement in streams: Transport, Retention, and  
526 Resuspension. *Scientific Reports*, 7, 5065.
- 527 SHOGREN, A. J., TANK, J. L., ANDRUSZKIEWICZ, E. A., OLDS, B., JERDE, C. & BOLSTER, D.  
528 2016. Modelling the transport of environmental DNA through a porous substrate using continuous  
529 flow-through column experiments. *J R Soc Interface*, 13.
- 530 SHOKRALLA, S., SPALL, J. L., GIBSON, J. F. & HAJIBABAEI, M. 2012. Next-generation sequencing  
531 technologies for environmental DNA research. *Molecular Ecology*, 21, 1794-1805.
- 532 TEAM, R. C. 2013. R: A language and environment for statistical computing.
- 533 TONKIN, J. D., ALTERMATT, F., FINN, D. S., HEINO, J., OLDEN, J. D., PAULS, S. U. & LYTLE, D.  
534 A. 2018. The role of dispersal in river network metacommunities: Patterns, processes, and  
535 pathways. *Freshwater Biology*, 63, 141-163.
- 536 VALENTINI, A., TABERLET, P., MIAUD, C., CIVADE, R., HERDER, J., THOMSEN, P. F.,  
537 BELLEMAIN, E., BESNARD, A., COISSAC, E., BOYER, F., GABORIAUD, C., JEAN, P.,  
538 POULET, N., ROSET, N., COPP, G. H., GENIEZ, P., PONT, D., ARGILLIER, C., BAUDOIN,  
539 J. M., PEROUX, T., CRIVELLI, A. J., OLIVIER, A., ACQUEBERGE, M., LE BRUN, M.,  
540 MOLLER, P. R., WILLERSLEV, E. & DEJEAN, T. 2016. Next-generation monitoring of aquatic  
541 biodiversity using environmental DNA metabarcoding. *Mol Ecol*, 25, 929-42.
- 542 WHITTAKER, R. H. 1972. Evolution and measurement of species diversity. *Taxon*, 213-251.
- 543 WILKINSON, L. & URBANEK, S. 2011. venneuler: Venn and Euler diagrams. *R package version*, 1.

544

545

546 **Figures**

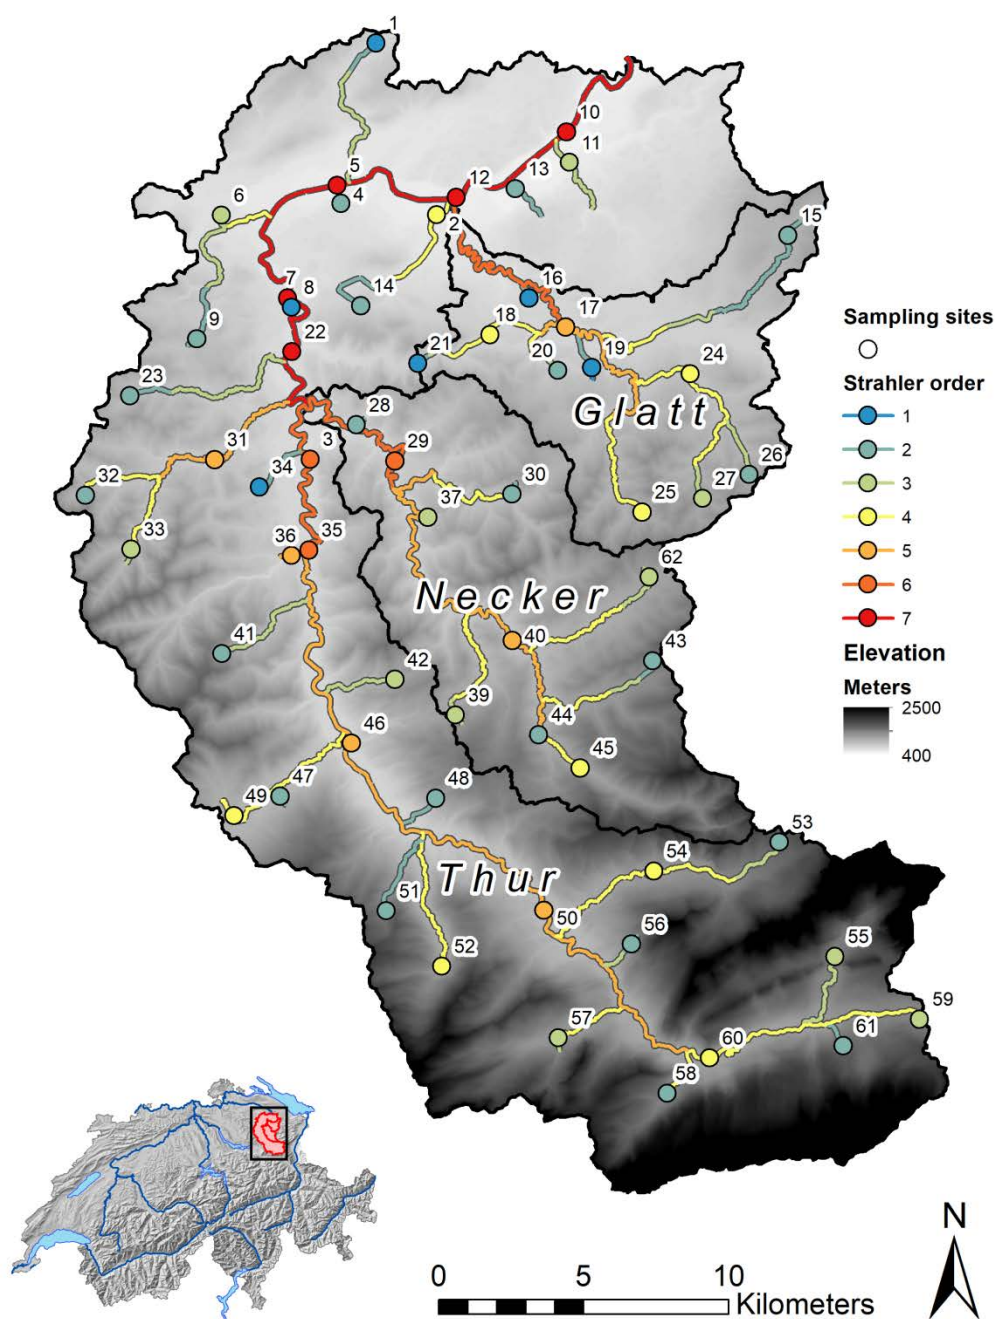

547

548 **Fig. 1:** Field sites in the river Thur catchment in North-Western Switzerland (insert at bottom  
549 right). Colors are coding for stream order (first to seventh order streams: blue, green, yellow,  
550 orange, orange-red, and red respectively). Black lines indicate the three major subcatchments:  
551 Thur, Necker and Glatt. Data source: swisstopo: VECTOR200 (2017), DEM25 (2003),  
552 SWISSTLM3D (2018); BAFU: EZG (2012); Bundesamt für Landestopographie (Art.30 Geo IV):  
553 5704 000 000, reproduced by permission of swisstopo / JA100119.



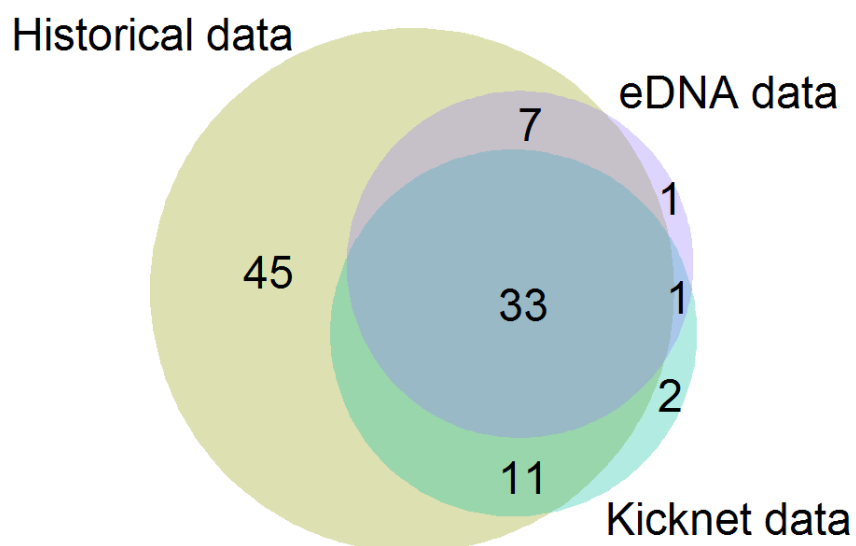

554

555 **Fig. 2:** Overlap of EPT genera in the three different datasets over the whole catchment. Bubble  
556 size is proportionate to the number of genera detected.

557

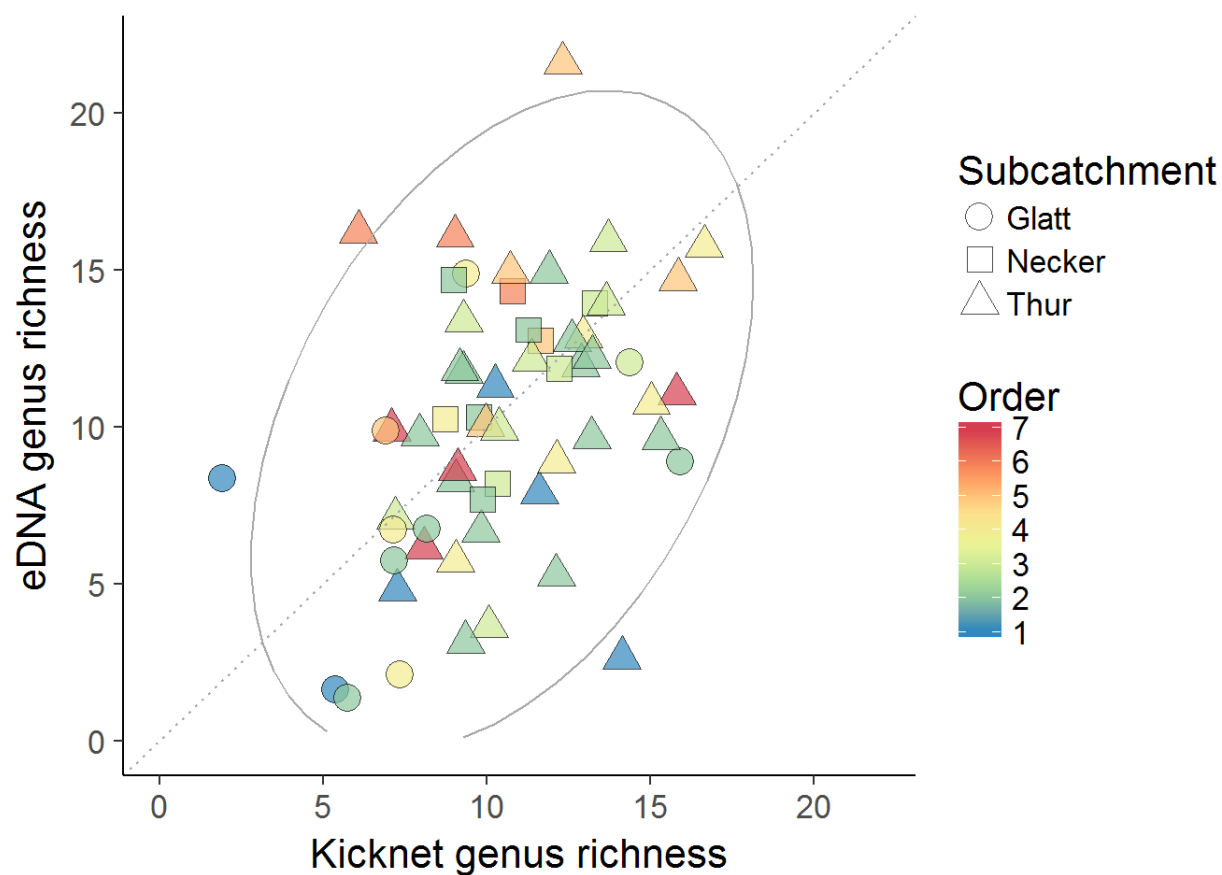

558

559 **Fig. 3:** Detected richness of EPT genera comparing kicknet versus eDNA sampling. The grey  
560 line indicates the confidence ellipse based on multivariate normal distribution and the dotted line  
561 is the 1:1 line. Colors and shapes of the individual data-points are according to stream order and  
562 the sampling sites' subcatchment respectively. Points are minimally jittered due to overlapping  
563 cases.

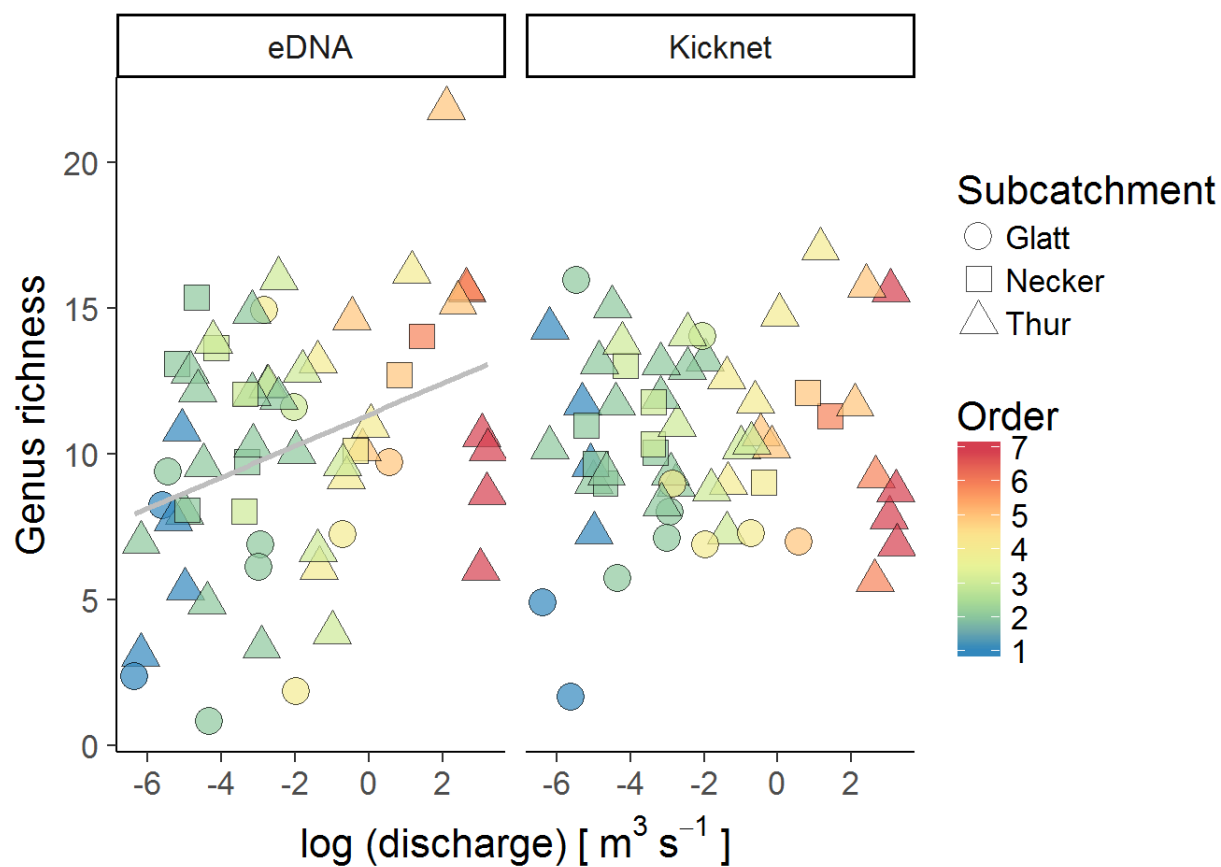

564

565 **Fig. 4:** Richness of eDNA and kicknet samples plotted against the logarithmic annual mean  
566 discharge. The grey line gives the significant linear regression line for eDNA only due to non-  
567 significance for kicknet genus richness. Colors are according to stream order and the shape  
568 indicates to what subcatchment the site belongs to. Points are minimally jittered due to  
569 overlapping cases.

570

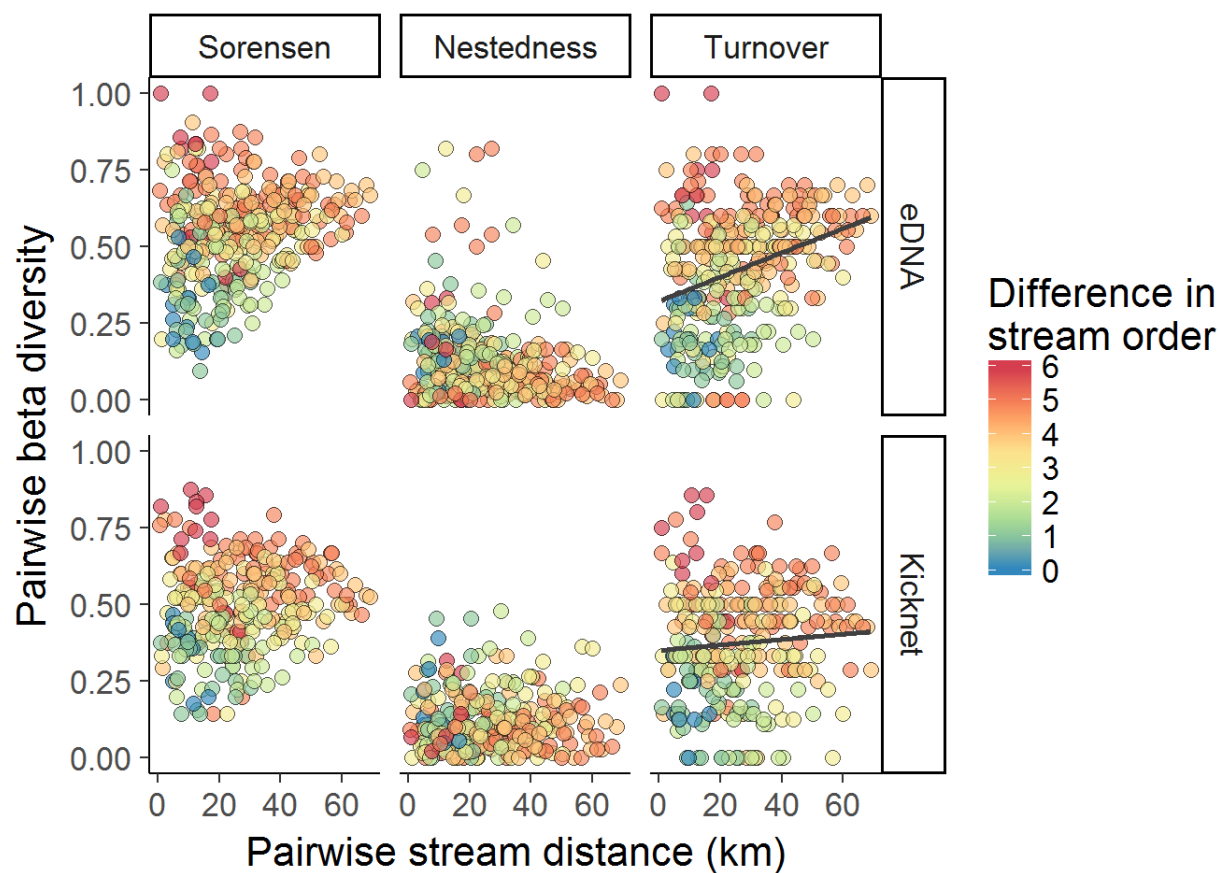

571

572 **Fig. 5:** Pairwise beta diversity against pairwise stream distance for flow connected sites only.  
573 Beta diversity is calculated based on Sorensen dissimilarity and is split into the two components  
574 of nestedness and turnover. The color gradient indicates the difference in stream orders of the  
575 pairwise compared sites and solid lines indicate the regression line in cases where stream distance  
576 showed relative importance too.
